# Supplementary material
Source: PubMed Central journal article supplement (PMC5023584)
Supplement: 10616_2016_9952_MOESM1_ESM.pdf [file 10616_2016_9952_MOESM1_ESM.pdf]

**a**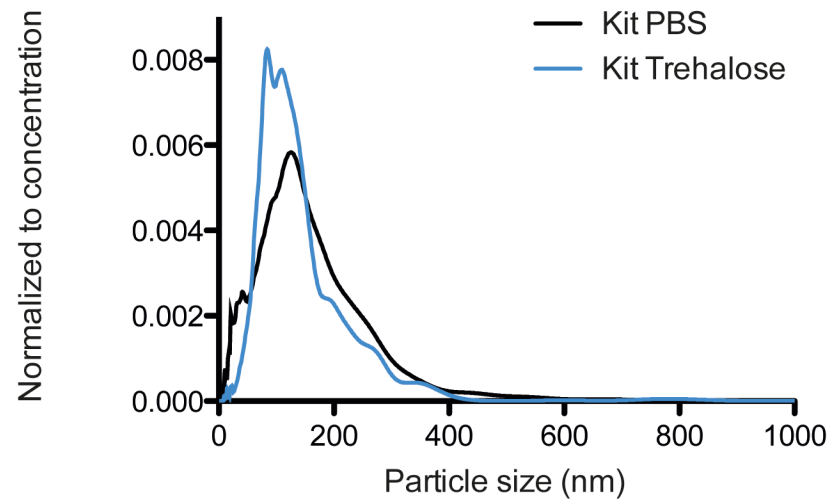**b**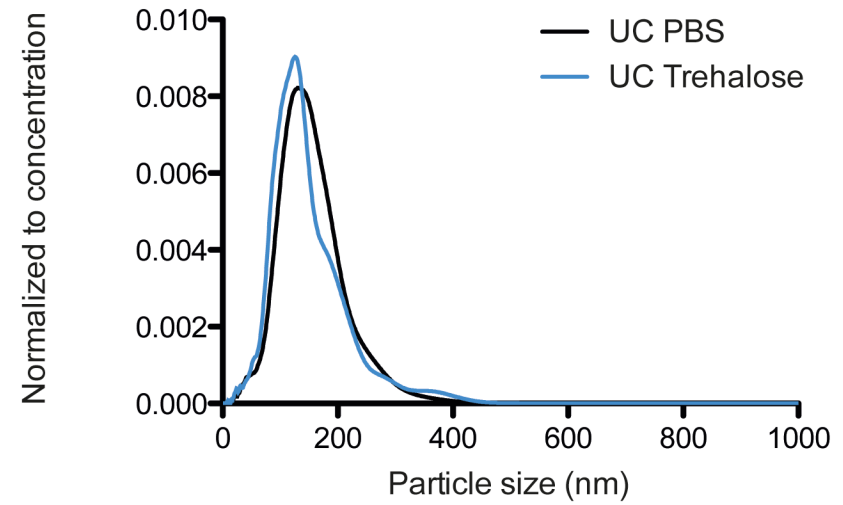

**Supplementary Figure 1.** Addition of trehalose to ASC exosomes does not change the size distribution. (a) The size distribution of exosomes isolated with *Total Exosome Isolation Kit* and resuspended in TPM. (b) The size distribution of exosomes isolated by sequential ultracentrifugation and resuspended in trehalose pulse medium. UC: Exosomes isolated by sequential ultracentrifugation.
